# Supplementary material for: Germline and Somatic BRCA1/2 Gene Mutational Status and Clinical Outcomes in Epithelial Peritoneal, Ovarian, and Fallopian Tube Cancer: Over a Decade of Experience in a Single Institution in Korea
Source: PubMed Central journal article supplement — Cancer Res Treat. 2020 Jul 27;52(4):1229–41. doi: 10.4143/crt.2020.557 (PMC7577800; doi:10.4143/crt.2020.557), 2020-07-27
Supplement: crt-2020-557-suppl1.pdf [file crt-2020-557-suppl1.pdf]

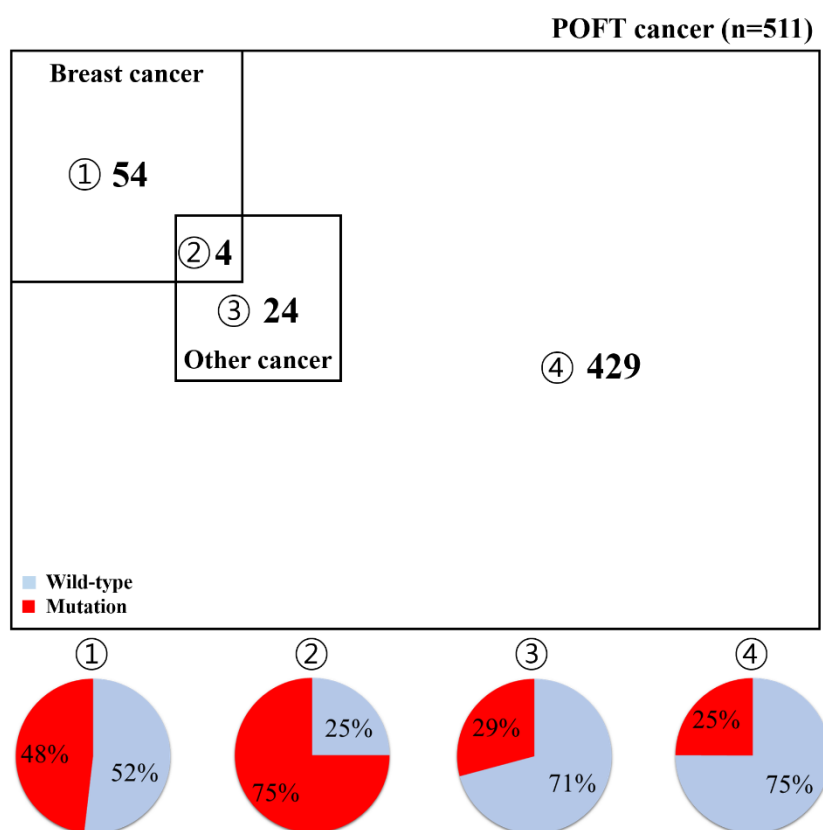

**S1 Fig.** *BRCA1/2* mutational status of the study population. POFT, peritoneal, ovarian, and fallopian tube.
