# Supplementary material for: Germline and Somatic BRCA1/2 Gene Mutational Status and Clinical Outcomes in Epithelial Peritoneal, Ovarian, and Fallopian Tube Cancer: Over a Decade of Experience in a Single Institution in Korea
Source: PubMed Central journal article supplement — Cancer Res Treat. 2020 Jul 27;52(4):1229–41. doi: 10.4143/crt.2020.557 (PMC7577800; doi:10.4143/crt.2020.557), 2020-07-27
Supplement: crt-2020-557-suppl3.pdf [file crt-2020-557-suppl3.pdf]

**S3 Table.** Clinicopathologic characteristics of patients with high-grade serous carcinoma

| Characteristic                                | Total<br>(n=368)     | <i>BRCA</i> wild-type<br>(n=246) | <i>BRCA</i> mutation<br>(n=122) | p-value |
|-----------------------------------------------|----------------------|----------------------------------|---------------------------------|---------|
| Age (yr)                                      | 55.9±10.0            | 56.9±10.2                        | 54.0±9.4                        | 0.010   |
| Parity                                        | 2.1±1.2              | 2.1±1.3                          | 2.0±1.1                         | 0.410   |
| Origin                                        |                      |                                  |                                 | 0.637   |
| Ovary                                         | 342 (92.9)           | 227 (92.3)                       | 115 (94.3)                      |         |
| Fallopian tube                                | 12 (3.3)             | 8 (3.3)                          | 4 (3.3)                         |         |
| Peritoneum                                    | 14 (3.8)             | 11 (4.5)                         | 3 (2.5)                         |         |
| Hx of BC                                      | 45 (12.2)            | 21 (8.5)                         | 24 (19.7)                       | 0.002   |
| Hx of other cancers                           | 13 (3.5)             | 8 (3.3)                          | 5 (4.1)                         | 0.766   |
| Family Hx of POFTC                            | 21 (5.7)             | 5 (2.0)                          | 16 (13.1)                       | < 0.001 |
| Family Hx of BC                               | 35 (9.5)             | 12 (4.9)                         | 23 (18.9)                       | < 0.001 |
| Family Hx of other cancers                    | 77 (20.9)            | 48 (19.5)                        | 29 (23.8)                       | 0.344   |
| FIGO stage                                    |                      |                                  |                                 | 0.308   |
| I                                             | 16 (4.3)             | 12 (4.9)                         | 4 (3.3)                         |         |
| II                                            | 30 (8.2)             | 24 (9.8)                         | 6 (4.9)                         |         |
| III                                           | 217 (59.0)           | 144 (58.5)                       | 73 (59.8)                       |         |
| IV                                            | 105 (28.5)           | 66 (26.8)                        | 39 (32.0)                       |         |
| CA-125 (IU/mL)                                | 929.0<br>(3.4-17313) | 972.0<br>(3.4-15700)             | 794.5<br>(5.1-17313)            | 0.474   |
| Primary treatment strategy                    |                      |                                  |                                 | 0.897   |
| PDS                                           | 255 (69.3)           | 171 (69.5)                       | 84 (68.9)                       |         |
| NAC                                           | 113 (30.7)           | 75 (30.5)                        | 38 (31.1)                       |         |
| Residual tumor after<br>PDS/IDS <sup>a)</sup> |                      |                                  |                                 | 0.533   |
| No gross                                      | 253 (68.8)           | 173 (70.3)                       | 80 (65.6)                       |         |
| < 1 cm                                        | 58 (15.8)            | 38 (15.4)                        | 20 (16.4)                       |         |
| 1-2 cm                                        | 22 (6.0)             | 12 (4.9)                         | 10 (8.2)                        |         |
| ≥ 2 cm                                        | 19 (5.2)             | 14 (5.7)                         | 5 (4.1)                         |         |
| Unknown                                       | 11 (3.0)             | 5 (2.0)                          | 6 (4.9)                         |         |
| Recurrence <sup>b)</sup>                      | 247 (67.1)           | 164 (66.7)                       | 83 (68.0)                       | 0.793   |
| PSR <sup>c)</sup>                             | 195 (53.0)           | 122 (49.6)                       | 73 (59.8)                       | 0.017   |
| PRR                                           | 51 (13.9)            | 41 (16.7)                        | 10 (8.2)                        |         |
| Genetic test methods                          |                      |                                  |                                 | 0.370   |
| Germline only                                 | 294 (79.9)           | 192 (78.0)                       | 102 (83.6)                      |         |
| Somatic only                                  | 23 (6.3)             | 18 (7.3)                         | 5 (4.1)                         |         |
| Both                                          | 51 (13.9)            | 36 (14.6)                        | 15 (12.3)                       |         |
| <i>BRCA1</i> mutational status                |                      |                                  |                                 | <0.001  |
| Wild-type                                     | 280 (76.1)           | 246 (100.0)                      | 34 (27.9)                       |         |
| Mutation                                      | 88 (23.9)            | 0                                | 88 (72.1)                       |         |
| <i>BRCA2</i> mutational status                |                      |                                  |                                 | <0.001  |
| Wild-type                                     | 333 (90.5)           | 246 (100.0)                      | 87 (71.3)                       |         |
| Mutation                                      | 35 (9.5)             | 0                                | 35 (28.7)                       |         |

Values are presented as mean±SD, number (%), or median (range). Hx, history; BC, breast cancer; POFTC, peritoneal, ovarian, and fallopian tubal cancers; FIGO, International Federation of Gynecology and Obstetrics; CA-125, cancer antigen 125; PDS, primary debulking surgery; NAC, neoadjuvant chemotherapy; IDS, interval debulking surgery; PSR, platinum-sensitive recurrence; PRR, platinum-resistant recurrence; SD, standard deviation.

<sup>a)</sup>Five patients did not receive debulking surgery, <sup>b)</sup>Among the recurred, one patient did not receive taxane- and platinum-based chemotherapy before, <sup>c)</sup>PSR was defined as relapse  $\geq 6$  months after completion of taxane- and platinum-based chemotherapy, whereas PRR as relapse  $< 6$  months.
